# Supplementary material for: The lifetime of floating liquid marbles: the influence of particle size and effective surface tension
Source: Royal Society of Chemistry journal article supplement (doi:10.1039/c3sm51304a), 2013-01-01
Supplement: c3sm51304a.pdf [file c3sm51304a.pdf]

## **Electronic supplementary information (ESI)**

# **Life Time of Floating Liquid Marbles: Influence of Particle Size and Effective Surface Tension**

*Ugur Cengiz and H. Yildirim Erbil\**

Gebze Institute of Technology, Department of Chemical Engineering,  
Cayirova, Gebze 41400, Kocaeli, Turkey.

\*Corresponding author: E-mail: [yerbil@gyte.edu.tr](mailto:yerbil@gyte.edu.tr) ,

Phone: +90 (262) 605 2114.

Fax: +90 (262) 605 2105.

**Movie 1.** Colored liquid marbles were prepared by using 8  $\mu\text{m}$  average sized P-Zonyl-TAN micropowder in this video. Both of the liquid marbles remained their dimensional stability under the application of strong mechanical collisions as seen in the video.

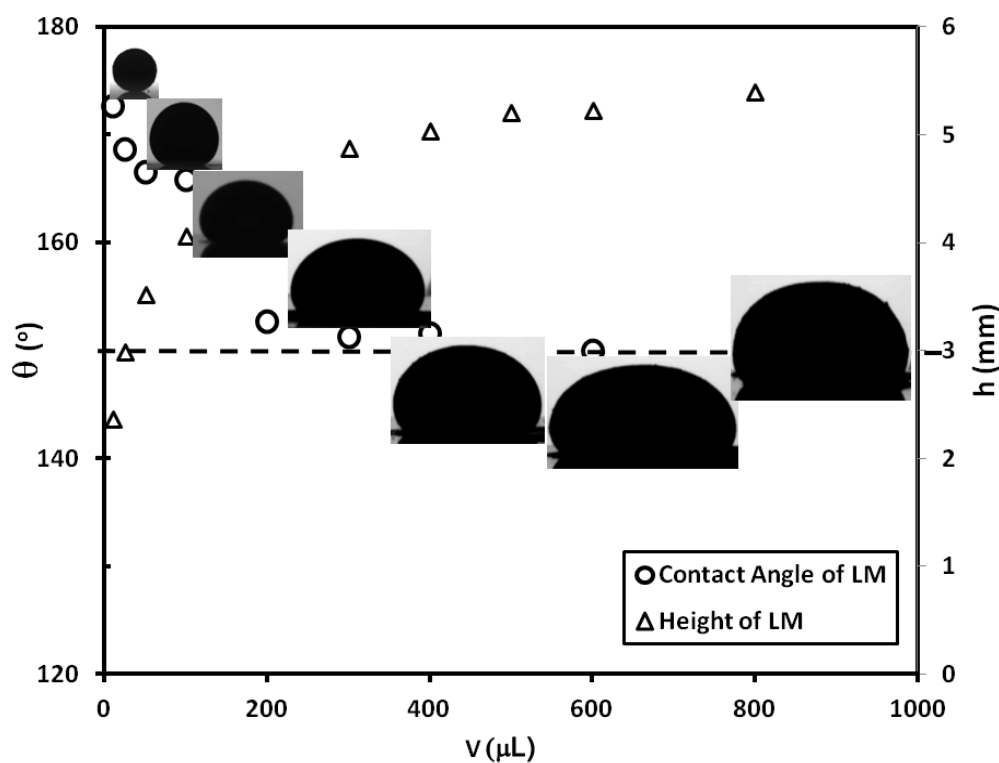

**Fig. S1.** Change of contact angle and height of liquid marble made of P-Zonyl-TAN-8 powder placed on a Teflon surface with the increase of the liquid marble water volume between 5-800  $\mu\text{L}$ .

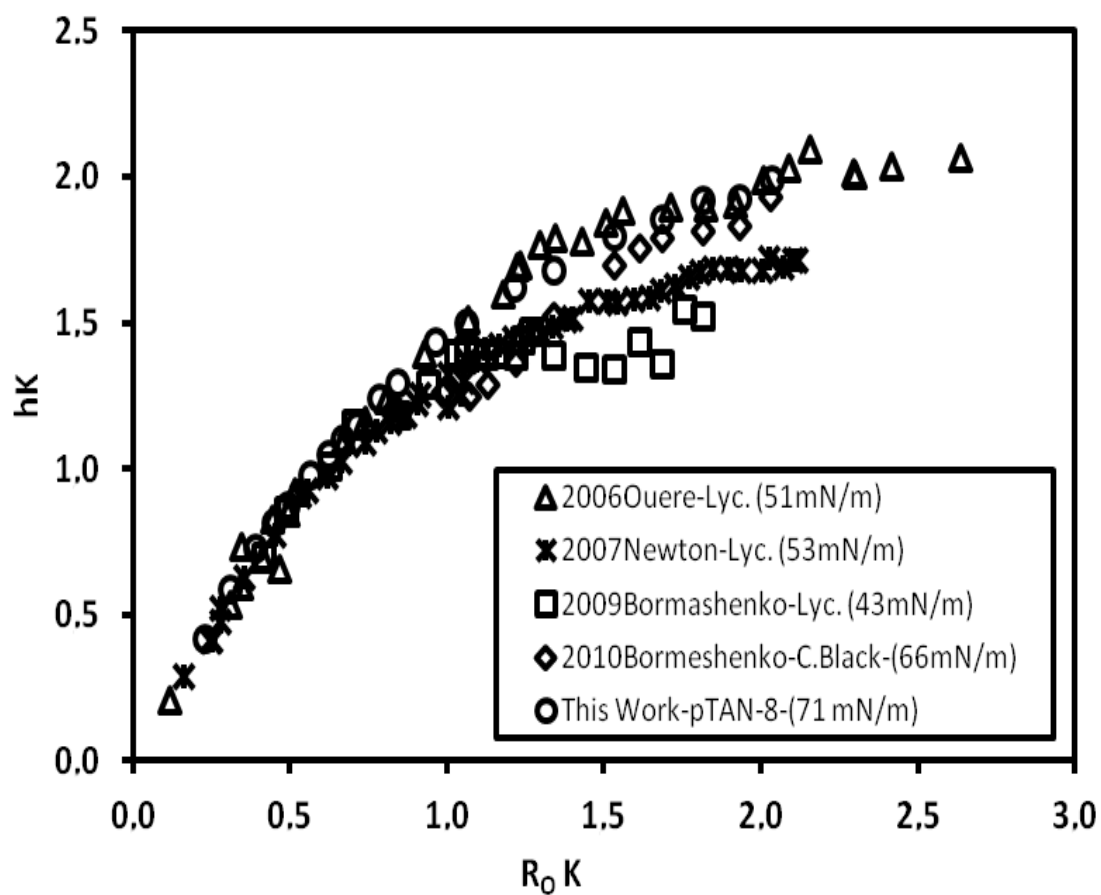

**Fig. S2. Height and size of the contact of liquid marbles, as a function of their radius before deposition. All the lengths are normalized by the capillary length.  $\circ$ : This work;  $\Delta$ : 2006 Ouere (Lycopodium);  $\times$ : 2007 Newton (Lycopodium);  $\square$ : 2009 Bormashenko (Lycopodium);  $\diamond$ : 2010 Bormashenko (C-Black).**
